# Supplementary material for: A carbon ion beam irradiated MWCNT/AuNPs composite sensor for a sensitive assay of purine-nucleosides of DNA
Source: Royal Society of Chemistry journal article supplement (doi:10.1039/c5ra18970e), 2015-01-01
Supplement: c5ra18970e1.pdf [file c5ra18970e1.pdf]

## Supporting information

### A carbon ion beam irradiated MWCNT/AuNPs composite sensor for sensitive assay of purine-nucleosides of DNA

Pankaj Gupta, Rosy, Rajendra N Goyal\*

**SI# Table 1:** Recovery data for dGuo and dAdo determination in herring sperm DNA using carbon beam irradiated MWCNT/AuNPs/GC.

| Sample No. | Spiked ( $\mu\text{M}$ ) | Observed <sup>a</sup> ( $\mu\text{M}$ ) | Actual <sup>b</sup> ( $\mu\text{M}$ ) | Recovery (%) |
|------------|--------------------------|-----------------------------------------|---------------------------------------|--------------|
| dGuo       |                          |                                         |                                       |              |
| 1          | 0                        | 29.94                                   | 29.94                                 | -            |
| 2          | 30                       | 58.87                                   | 28.37                                 | 98.19        |
| 3          | 50                       | 80.31                                   | 30.31                                 | 100.46       |
| 4          | 80                       | 111.16                                  | 31.16                                 | 101.10       |
| 5          | 100                      | 130.95                                  | 30.95                                 | 100.74       |
| dAdo       |                          |                                         |                                       |              |
| 1          | 0                        | 20.67                                   | 21.47                                 | -            |
| 2          | 40                       | 60.92                                   | 20.92                                 | 100.41       |
| 3          | 80                       | 99.91                                   | 19.91                                 | 99.25        |
| 4          | 120                      | 141.16                                  | 21.16                                 | 100.34       |
| 5          | 160                      | 181.17                                  | 21.17                                 | 100.27       |

The R.S.D. value for the determination was less than 1.17% for n=3

a The observed values are sum of present + spiked amount.

b The actual amount is observed – spiked amount.

**SI# Table 2:** Recovery data for dGuo and dAdo determination in DNA extracted from the MCF7 cell line (human breast cancer cells) using carbon beam irradiated MWCNT/AuNPs/GC.

| Sample No. | Spiked ( $\mu\text{M}$ ) | Observed <sup>a</sup> ( $\mu\text{M}$ ) | Actual <sup>b</sup> ( $\mu\text{M}$ ) | Recovery (%) |
|------------|--------------------------|-----------------------------------------|---------------------------------------|--------------|
| dGuo       |                          |                                         |                                       |              |
| 1          | 0                        | 28.13                                   | 28.13                                 | -            |
| 2          | 50                       | 78.95                                   | 28.95                                 | 101.04       |
| 3          | 100                      | 126.98                                  | 26.87                                 | 99.11        |
| 4          | 150                      | 177.06                                  | 27.06                                 | 99.40        |
| dAdo       |                          |                                         |                                       |              |
| 1          | 0                        | 9.15                                    | 9.15                                  | -            |
| 2          | 30                       | 39.57                                   | 9.57                                  | 101.07       |
| 3          | 70                       | 78.19                                   | 8.19                                  | 98.78        |
| 4          | 120                      | 127.83                                  | 7.83                                  | 98.98        |

The R.S.D. value for the determination was less than 1.34% for n=3

a The observed values are sum of present + spiked amount.

b The actual amount is observed – spiked amount.
